# Supplementary material
Source: PubMed Central journal article supplement (PMC6928398)
Supplement: NIHMS1040628-supplement-Supplemental_Material.pdf [file NIHMS1040628-supplement-Supplemental_Material.pdf]

FFiCD: Supplemental Materials

Joshua R. Oltmanns and Thomas A. Widiger

University of Kentucky

## FFiCD SUPPLEMENTAL MATERIALS

**Study 2 Participants.** Twenty-eight percent were currently in mental health treatment, 14% in the past one month, 30% in the past one year, 12% in the past five years, 9% in the past ten years, and 7% outside the past ten years. Fifty-nine percent were currently taking psychiatric medications, and 85% had taken psychiatric medications in the past. Participants reported receiving mental health treatment for a variety of conditions: Depression (75%), anxiety (63%), personality disorder (12%), substance abuse (10%), alcohol abuse (7%), psychosis (6%), and 9% other, which participants provided in an additional text box, including: autism, ADHD, bipolar disorder, anorexia nervosa, OCD, PTSD, family and marriage issues, self-harm, phobia, and post-partum depression. Participants reported seeing psychiatrists (55%), psychologists (57%), social workers (20%), family therapists (24%), and 10% other, including: counselors, hypnotherapists, nurse practitioners, primary care physicians, and religious counselors. Marital status consisted of 55% married, 32% single, 4% divorced, 8% cohabiting, and 1% widowed. Hispanic or Latino ethnicity was endorsed by 14% of the sample. Racial backgrounds endorsed were 89% white, 6% black or African American, 3% Asian, and 5% American Indian or Alaska Native. Four participants endorsed multiple racial backgrounds.

**Study 3 Participants.** Twenty-eight percent were currently in mental health treatment, 11% in the past one month, 29% in the past one year, 16% in the past five years, 9% in the past ten years, and 6% outside the past ten years. Forty-five percent were currently taking psychiatric medications, and 82% had taken psychiatric medications in the past. Participants reported receiving mental health treatment for a variety of conditions: Depression (76%), anxiety (63%), personality disorder (7%), substance abuse (6%), alcohol abuse (7%), psychosis (2%), and 11% other, which participants provided in an additional text box, including: ADHD, anorexia nervosa, autism, bipolar disorder, childhood sexual abuse, cyclothymia, gender dysphoria, marital

## FFiCD SUPPLMENTAL MATERIALS

problems, OCD, panic disorder, PTSD, pre-menstrual dysphoric disorder, schizophrenia, and sexual dysfunction. Participants reported seeing psychiatrists (57%), psychologists (54%), social workers (15%), family therapists (17%), and 6% other, including counselors and primary care physicians. Marital status consisted of 43% married, 35% single, 8% divorced, 14% cohabiting, and 0.3% widowed. Hispanic or Latino ethnicity was endorsed by 8% of the sample. Racial backgrounds endorsed were 85% white, 12% black or African American, 3% Asian, 2% American Indian or Alaska Native, and 0.3% Pacific Islander. Seven participants endorsed multiple racial backgrounds.

FFiCD SUPPLMENTAL MATERIALS

Table S1. *Study 3 FFiCD Descriptive Statistics.*

| FFiCD Domain/Facet                 | <i>M</i>   | <i>SD</i>  | Alpha      | MIC        | FFiCD Nuance              | <i>M</i> | <i>SD</i> | Alpha | MIC |
|------------------------------------|------------|------------|------------|------------|---------------------------|----------|-----------|-------|-----|
| <b><i>Negative Affectivity</i></b> | <b>3.1</b> | <b>0.8</b> | <b>.97</b> | <b>.41</b> | Evaluation Apprehension   | 3.5      | 1.1       | .65   | .49 |
| Anxiousness                        | 3.4        | 1.0        | .84        | .46        | Separation Insecurity     | 3.3      | 1.2       | .74   | .59 |
|                                    |            |            |            |            | Social Anxiousness        | 3.5      | 1.2       | .76   | .61 |
| Vulnerability                      | 3.2        | 1.0        | .81        | .47        | Fragility                 | 3.2      | 1.0       | .73   | .47 |
|                                    |            |            |            |            | Need for Admiration       | 3.3      | 1.2       | .69   | .53 |
| Emotional Lability                 | 2.8        | 1.1        | .90        | .59        | Affective Dysregulation   | 2.9      | 1.1       | .82   | .61 |
|                                    |            |            |            |            | Rapidly Shifting Emotions | 2.8      | 1.1       | .82   | .60 |
| Anger                              | 3.0        | 1.0        | .88        | .54        | Dysregulated Anger        | 2.9      | 1.1       | .66   | .49 |
|                                    |            |            |            |            | Reactive Anger            | 3.0      | 1.1       | .66   | .49 |
|                                    |            |            |            |            | Annoyed                   | 3.0      | 1.1       | .81   | .68 |
| Depressiveness                     | 2.9        | 1.0        | .87        | .46        | Interpersonal Inadequacy  | 3.1      | 1.2       | .75   | .60 |
|                                    |            |            |            |            | Suicidality               | 2.6      | 1.4       | .88   | .78 |
|                                    |            |            |            |            | Pessimism                 | 2.9      | 1.2       | .75   | .60 |
|                                    |            |            |            |            | Worthlessness             | 2.9      | 1.2       | .74   | .59 |
| Shame                              | 3.3        | 1.0        | .85        | .49        | Self-Consciousness        | 3.2      | 1.0       | .72   | .46 |
|                                    |            |            |            |            | Humiliation               | 3.4      | 1.1       | .80   | .57 |
| Distrust                           | 2.9        | 1.1        | .78        | .54        |                           |          |           |       |     |
| <b><i>Detachment</i></b>           | <b>3.0</b> | <b>0.7</b> | <b>.84</b> | <b>.29</b> | Social Isolation          | 3.7      | 1.2       | .85   | .73 |
| Social Detachment                  | 3.5        | 1.0        | .78        | .47        | Coldness                  | 3.3      | 1.1       | .75   | .60 |
| Emotional Detachment               | 2.7        | 0.9        | .78        | .37        | Joylessness               | 2.8      | 1.2       | .75   | .60 |
|                                    |            |            |            |            | Social Anhedonia          | 2.9      | 1.2       | .80   | .67 |
|                                    |            |            |            |            | Physical Anhedonia        | 2.2      | 1.0       | .53   | .36 |
| Unassertiveness                    | 3.0        | 1.0        | .72        | .47        |                           |          |           |       |     |
| <b><i>Anankastic</i></b>           | <b>3.3</b> | <b>0.6</b> | <b>.88</b> | <b>.26</b> | Fastidiousness            | 3.2      | 1.0       | .72   | .47 |
| Perfectionism                      | 3.3        | 0.8        | .76        | .34        | Punctiliousness           | 3.3      | 0.9       | .66   | .40 |
| Workaholism                        | 3.2        | 0.8        | .70        | .28        | Workaholism               | 3.0      | 1.0       | .73   | .48 |

FFiCD SUPPLMENTAL MATERIALS

|                             |            |            |            |            |                         |     |     |     |     |
|-----------------------------|------------|------------|------------|------------|-------------------------|-----|-----|-----|-----|
|                             |            |            |            |            | Doggedness              | 3.3 | 0.9 | .63 | .37 |
| Inflexibility               | 3.4        | 0.7        | .80        | .29        | Rigidity                | 3.5 | 0.9 | .46 | .30 |
|                             |            |            |            |            | Ruminative Deliberation | 3.7 | 0.9 | .76 | .51 |
|                             |            |            |            |            | Risk Aversiveness       | 3.4 | 1.1 | .74 | .59 |
|                             |            |            |            |            | Dogmatism               | 3.1 | 1.0 | .67 | .40 |
| <b><i>Dissocial</i></b>     | <b>2.2</b> | <b>0.8</b> | <b>.93</b> | <b>.38</b> | Selfishness             | 2.3 | 1.0 | .47 | .31 |
| Self-Centeredness           | 2.2        | 0.8        | .82        | .37        | Entitlement             | 2.1 | 0.9 | .51 | .34 |
|                             |            |            |            |            | Vanity                  | 2.3 | 1.0 | .52 | .35 |
|                             |            |            |            |            | Arrogance               | 2.0 | 1.0 | .69 | .53 |
| Lack of Empathy             | 2.2        | 0.9        | .86        | .44        | Callousness             | 2.2 | 1.0 | .72 | .46 |
|                             |            |            |            |            | Exploitativeness        | 2.2 | 1.1 | .70 | .54 |
|                             |            |            |            |            | Manipulativeness        | 2.2 | 1.0 | .79 | .56 |
| Aggression                  | 2.3        | 0.9        | .79        | .39        | Physical Aggression     | 2.4 | 1.1 | .58 | .41 |
|                             |            |            |            |            | Verbal Aggression       | 2.1 | 1.0 | .57 | .41 |
|                             |            |            |            |            | Passive Aggression      | 2.3 | 1.1 | .72 | .57 |
| <b><i>Disinhibition</i></b> | <b>2.6</b> | <b>0.8</b> | <b>.94</b> | <b>.41</b> | Rash Behaviors          | 2.5 | 1.0 | .80 | .57 |
| Rashness                    | 2.6        | 0.9        | .85        | .48        | Rash Thinking           | 2.8 | 1.0 | .73 | .47 |
| Irresponsibility            | 2.6        | 0.9        | .90        | .48        | Impersistence           | 2.8 | 1.1 | .80 | .58 |
|                             |            |            |            |            | Distractibility         | 2.4 | 1.0 | .78 | .54 |
|                             |            |            |            |            | Ineptitude              | 2.5 | 1.0 | .62 | .45 |
|                             |            |            |            |            | Disobliged              | 2.6 | 1.1 | .66 | .50 |
| Disorderliness              | 2.5        | 1.0        | .85        | .53        | Disorganization         | 2.5 | 1.2 | .85 | .65 |
|                             |            |            |            |            | Disorganized Speech     | 2.4 | 1.1 | .71 | .55 |
| Thrill-Seeking              | 2.5        | 1.0        | .74        | .48        |                         |     |     |     |     |

FFiCD SUPPLMENTAL MATERIALS

Table S2. *Domain-Level Correlations.*

| Scale    | FFiCD DT    | FFiCD DL    | FFiCD AK   | FFiCD NA   | FFiCD DN    | PiCD DT     | PiCD DL     | PiCD AK    | PiCD NA    | PiCD DN     | PID5 DT     | PID5 AT     | PID5 DN     | PID5 NA    | FFM E | FFM A | FFM C |
|----------|-------------|-------------|------------|------------|-------------|-------------|-------------|------------|------------|-------------|-------------|-------------|-------------|------------|-------|-------|-------|
| FFiCD DL | .28         |             |            |            |             |             |             |            |            |             |             |             |             |            |       |       |       |
| FFiCD AK | .44         | .07         |            |            |             |             |             |            |            |             |             |             |             |            |       |       |       |
| FFiCD NA | <b>.68</b>  | .30         | .35        |            |             |             |             |            |            |             |             |             |             |            |       |       |       |
| FFiCD DN | .46         | <b>.62</b>  | -.03       | <b>.69</b> |             |             |             |            |            |             |             |             |             |            |       |       |       |
| PiCD DT  | <b>.84</b>  | .31         | .38        | <b>.58</b> | .40         |             |             |            |            |             |             |             |             |            |       |       |       |
| PiCD DL  | .19         | <b>.88</b>  | .10        | .25        | <b>.53</b>  | .28         |             |            |            |             |             |             |             |            |       |       |       |
| PiCD AK  | .26         | -.12        | <b>.74</b> | .19        | -.23        | .26         | -.01        |            |            |             |             |             |             |            |       |       |       |
| PiCD NA  | <b>.62</b>  | .30         | .35        | <b>.89</b> | <b>.63</b>  | <b>.54</b>  | .28         | .26        |            |             |             |             |             |            |       |       |       |
| PiCD DN  | .31         | <b>.67</b>  | -.16       | .47        | <b>.86</b>  | .32         | <b>.62</b>  | -.33       | .47        |             |             |             |             |            |       |       |       |
| PID5 DT  | <b>.75</b>  | .31         | .26        | <b>.59</b> | .42         | <b>.74</b>  | .28         | .15        | <b>.55</b> | .32         |             |             |             |            |       |       |       |
| PID5 AT  | .14         | <b>.82</b>  | .05        | .21        | .47         | .19         | <b>.80</b>  | -.05       | .26        | <b>.55</b>  | .32         |             |             |            |       |       |       |
| PID5 DN  | .34         | <b>.62</b>  | -.12       | <b>.54</b> | <b>.85</b>  | .33         | <b>.56</b>  | -.32       | <b>.53</b> | <b>.85</b>  | .45         | <b>.62</b>  |             |            |       |       |       |
| PID5 NA  | .48         | .25         | .25        | <b>.82</b> | <b>.61</b>  | .37         | .22         | .13        | <b>.83</b> | .45         | .49         | .31         | <b>.60</b>  |            |       |       |       |
| FFM E    | <b>-.55</b> | .24         | -.08       | -.40       | -.08        | <b>-.51</b> | .28         | -.11       | -.35       | .08         | <b>-.53</b> | .28         | -.01        | -.25       |       |       |       |
| FFM A    | -.17        | <b>-.64</b> | .13        | -.15       | -.33        | -.23        | <b>-.62</b> | .21        | -.15       | -.37        | -.31        | <b>-.57</b> | -.41        | -.13       | .08   |       |       |
| FFM C    | -.21        | -.31        | .45        | -.34       | <b>-.68</b> | -.21        | -.26        | <b>.51</b> | -.29       | <b>-.69</b> | -.28        | -.23        | <b>-.67</b> | -.33       | .27   | .38   |       |
| FFM N    | <b>.51</b>  | .14         | .17        | <b>.84</b> | <b>.58</b>  | .44         | .10         | .03        | <b>.79</b> | .39         | <b>.53</b>  | .12         | <b>.51</b>  | <b>.77</b> | -.40  | -.07  | -.39  |

*Note.* FFiCD = Five-Factor Personality Inventory for ICD-11, PiCD = Personality Inventory for ICD-11, PID-5 = Personality Inventory for DSM-5, FFM = five-factor model, N = neuroticism/negative affectivity, DL = dissociability, AT = antagonism, DN = disinhibition, A = agreeableness, C = conscientiousness, AK = anankastia, DT = detachment, E = extraversion.

FFiCD SUPPLMENTAL MATERIALS

Table S3. *Domain-Level Six-Factor EFA of the FFiCD, PiCD, PID-5, and FFM.*

| Scale    | NA         | DL          | DT          | AK +<br>/ DN - | factor<br>5 | factor<br>6 | h2  |
|----------|------------|-------------|-------------|----------------|-------------|-------------|-----|
| PID5 N   | <b>.96</b> | .00         | -.08        | .02            | -.10        | .15         | .85 |
| PiCD N   | <b>.90</b> | .08         | .03         | .14            | .05         | -.08        | .88 |
| FFiCD N  | <b>.88</b> | .02         | .10         | .07            | .10         | -.11        | .93 |
| FFM N    | <b>.87</b> | -.14        | .05         | -.11           | -.05        | .00         | .78 |
| FFiCD DN | <b>.43</b> | .17         | .12         | <b>-.37</b>    | <b>.40</b>  | .08         | .91 |
| PiCD DL  | .00        | <b>.88</b>  | -.01        | .09            | .16         | .03         | .88 |
| FFM A    | .01        | <b>-.86</b> | -.04        | .17            | .23         | .26         | .71 |
| FFiCD DL | -.01       | <b>.84</b>  | .06         | .00            | .19         | .05         | .90 |
| PID5 AT  | .06        | <b>.77</b>  | .01         | .03            | -.13        | <b>.36</b>  | .87 |
| PiCD DT  | -.08       | .07         | <b>.91</b>  | .09            | .12         | -.03        | .82 |
| FFiCD DT | .06        | -.03        | <b>.87</b>  | .10            | .13         | -.02        | .87 |
| PID5 DT  | .08        | .10         | <b>.82</b>  | -.04           | -.22        | .16         | .80 |
| FFM E    | -.16       | .22         | <b>-.59</b> | .17            | .28         | <b>.35</b>  | .78 |
| PiCD AK  | .17        | .03         | .11         | <b>.82</b>     | .00         | -.06        | .70 |
| FFiCD AK | .19        | .05         | .22         | <b>.81</b>     | .12         | .04         | .77 |
| FFM C    | -.19       | -.08        | -.13        | <b>.76</b>     | -.13        | .11         | .79 |
| PID5 DN  | .33        | .22         | .17         | <b>-.45</b>    | .14         | <b>.34</b>  | .89 |
| PiCD DN  | .18        | .25         | .13         | <b>-.45</b>    | <b>.45</b>  | .16         | .91 |

*Note.* FFiCD = Five-Factor Personality Inventory for ICD-11, PiCD = Personality Inventory for ICD-11, PID-5 = Personality Inventory for DSM-5, FFM = five-factor model, N = neuroticism/negative affectivity, DL = dissociativity, DN = disinhibition, A = agreeableness, C = conscientiousness, AK = anankastia, DT = detachment, E = extraversion.

FFiCD SUPPLMENTAL MATERIALS

Table S4. *Seven-Factor EFA of the FFiCD Facets and PiCD, PID-5, and FFM Domains.*

| Scale                   | NA         | DL          | DT          | DN          | AK          | factor<br>6 | factor<br>7 | <i>h</i> <sup>2</sup> |
|-------------------------|------------|-------------|-------------|-------------|-------------|-------------|-------------|-----------------------|
| PID5 NA                 | <b>.93</b> | .14         | -.07        | .01         | .02         | .03         | -.18        | .85                   |
| FFM N                   | <b>.90</b> | -.10        | .06         | -.02        | -.15        | -.02        | .02         | .81                   |
| PiCD NA                 | <b>.82</b> | .10         | .05         | .06         | .14         | -.01        | .02         | .86                   |
| FFiCD Emotional Labilty | <b>.80</b> | .08         | .04         | .02         | -.10        | .12         | .13         | .80                   |
| FFiCD Anxiousness       | <b>.77</b> | -.22        | .09         | .10         | .12         | .01         | .05         | .80                   |
| FFiCD Vulnerability     | <b>.76</b> | -.16        | .03         | .19         | .15         | -.09        | .02         | .82                   |
| FFiCD Shamefulness      | <b>.67</b> | -.07        | .09         | .13         | .25         | -.04        | .03         | .73                   |
| FFiCD Depressiveness    | <b>.64</b> | -.06        | .26         | .12         | -.03        | .03         | -.03        | .72                   |
| FFiCD Anger             | <b>.59</b> | .19         | -.03        | .03         | .09         | -.03        | <b>.43</b>  | .74                   |
| FFiCD Mistrustfulness   | <b>.54</b> | .23         | .15         | -.06        | .06         | .03         | .25         | .63                   |
| PID5 AT                 | .10        | <b>.92</b>  | .00         | .01         | .04         | .09         | -.21        | .88                   |
| FFiCD Lack of Empathy   | -.03       | <b>.79</b>  | .11         | .14         | .00         | .03         | .11         | .84                   |
| PiCD DL                 | -.05       | <b>.79</b>  | .02         | .12         | .09         | .13         | .16         | .87                   |
| FFM A                   | -.02       | <b>-.74</b> | -.14        | .16         | .23         | .26         | -.22        | .70                   |
| FFiCD Self-Centeredness | -.10       | <b>.72</b>  | -.03        | .24         | .15         | .13         | .10         | .76                   |
| FFiCD Aggressiveness    | .01        | <b>.50</b>  | .10         | .14         | -.07        | .27         | <b>.32</b>  | .78                   |
| PiCD DT                 | -.07       | .00         | <b>.86</b>  | .14         | .14         | .04         | .06         | .83                   |
| PID5 DT                 | .19        | .19         | <b>.80</b>  | -.08        | -.08        | -.04        | -.15        | .80                   |
| FFiCD Emotional Det.    | -.05       | .15         | <b>.76</b>  | .11         | .04         | .06         | .05         | .71                   |
| FFiCD Social Det.       | .07        | -.18        | <b>.65</b>  | -.10        | .19         | .09         | .14         | .61                   |
| FFM E                   | -.16       | .21         | <b>-.56</b> | .01         | .04         | <b>.51</b>  | -.03        | .79                   |
| FFiCD Irresponsibility  | .28        | .08         | .10         | <b>.68</b>  | .01         | -.06        | .05         | .86                   |
| FFiCD Disorderliness    | .19        | .08         | .03         | <b>.67</b>  | -.03        | .05         | .06         | .72                   |
| PiCD DN                 | .06        | .20         | .08         | <b>.66</b>  | -.16        | .24         | .04         | .90                   |
| FFM C                   | -.04       | -.09        | -.09        | <b>-.64</b> | <b>.35</b>  | .26         | -.01        | .83                   |
| PID5 DN                 | <b>.30</b> | .31         | .13         | <b>.42</b>  | -.25        | .20         | -.14        | .87                   |
| FFiCD Unassertiveness   | <b>.31</b> | -.24        | .22         | <b>.39</b>  | .21         | -.12        | -.06        | .55                   |
| FFiCD Rashness          | <b>.35</b> | .15         | .00         | <b>.38</b>  | -.15        | <b>.30</b>  | .16         | .75                   |
| PiCD AK                 | .05        | .12         | .02         | -.11        | <b>.86</b>  | -.10        | -.05        | .78                   |
| FFiCD Inflexibility     | .13        | -.05        | .18         | .02         | <b>.75</b>  | .00         | .08         | .75                   |
| FFiCD Perfectionism     | .12        | .05         | .14         | -.14        | <b>.64</b>  | .21         | .05         | .65                   |
| FFiCD Thrill-Seeking    | .13        | .19         | .09         | .13         | <b>-.30</b> | <b>.55</b>  | .11         | .67                   |
| FFiCD Workaholism       | .05        | .04         | .15         | -.33        | <b>.39</b>  | <b>.51</b>  | .03         | .64                   |

*Note.* FFiCD = Five-Factor Personality Inventory for ICD-11, PiCD = Personality Inventory for ICD-11, PID-5 = Personality Inventory for DSM-5, FFM = five-factor model, N = neuroticism/negative affectivity, DL = dissociality, DN = disinhibition, A = agreeableness, C = conscientiousness, AK = anankastia, DT = detachment, E = extraversion.



## FFiCD SUPPLMENTAL MATERIALS

Table S5

*Exploratory Bifactor Model Fit Indices*

---

| Number of factors | chi sq   | RMSR | TLI   | RMSEA (90% CI)    | BIC     |
|-------------------|----------|------|-------|-------------------|---------|
| 3                 | 10593.78 | 0.06 | 0.768 | .125 (.116, .126) | -136.20 |
| 4                 | 10593.78 | 0.03 | 0.838 | .104 (.096, .106) | -666.03 |
| 5                 | 10593.78 | 0.03 | 0.871 | .093 (.085, .095) | -849.43 |
| 6                 | 10593.78 | 0.02 | 0.890 | .086 (.077, .089) | -912.86 |

---

FFiCD SUPPLMENTAL MATERIALS

Table S6. 6-factor EBFA of the FFiCD facets and FFM, PID-5, and PiCD domains

|           | g-PD        | NA         | DT          | DL          | AK +<br>/ DN | AK +<br>/ DN | h2  |
|-----------|-------------|------------|-------------|-------------|--------------|--------------|-----|
| FFM N     | <b>.57</b>  | <b>.67</b> | .05         | -.07        | .01          | -.15         | .81 |
| PID5 NA   | <b>.66</b>  | <b>.65</b> | -.15        | .03         | -.01         | .02          | .80 |
| PiCD NA   | <b>.73</b>  | <b>.55</b> | -.01        | .03         | -.02         | .13          | .87 |
| FFiCD EMO | <b>.74</b>  | <b>.55</b> | -.03        | .04         | .06          | -.14         | .79 |
| FFiCD VLN | <b>.56</b>  | <b>.54</b> | .02         | -.17        | -.13         | .12          | .81 |
| FFiCD ANX | <b>.57</b>  | <b>.53</b> | .06         | -.21        | -.03         | .08          | .79 |
| FFiCD SHM | <b>.60</b>  | <b>.45</b> | .05         | -.10        | -.05         | .21          | .72 |
| FFiCD DEP | <b>.63</b>  | <b>.43</b> | .18         | -.08        | -.06         | -.05         | .71 |
| FFiCD MST | <b>.67</b>  | <b>.37</b> | .14         | .21         | .16          | -.01         | .60 |
| FFiCD ANG | <b>.69</b>  | <b>.36</b> | .03         | .18         | .03          | .07          | .60 |
| PiCD DT   | <b>.60</b>  | -.15       | <b>.70</b>  | -.04        | .00          | .06          | .84 |
| FFM E     | -.01        | -.23       | <b>-.67</b> | .02         | .26          | -.12         | .79 |
| PID5 DT   | <b>.55</b>  | .13        | <b>.62</b>  | .14         | .05          | -.06         | .71 |
| FFiCD EDT | <b>.62</b>  | -.12       | <b>.62</b>  | .09         | .03          | -.04         | .72 |
| FFiCD SDT | <b>.39</b>  | -.01       | <b>.58</b>  | -.16        | .23          | .07          | .61 |
| FFM A     | <b>-.32</b> | -.07       | -.20        | <b>-.75</b> | .05          | .08          | .69 |
| FFiCD LOE | <b>.65</b>  | -.09       | .01         | <b>.61</b>  | -.04         | -.02         | .85 |
| PID5 AT   | <b>.59</b>  | .00        | -.17        | <b>.60</b>  | .03          | .03          | .76 |
| PiCD DL   | <b>.67</b>  | -.16       | -.11        | <b>.57</b>  | -.02         | .09          | .87 |
| FFiCD SC  | <b>.62</b>  | -.18       | -.16        | <b>.49</b>  | -.05         | .08          | .75 |
| FFiCD AGG | <b>.70</b>  | -.13       | -.02        | <b>.36</b>  | .07          | -.15         | .74 |
| FFM C     | <b>-.34</b> | .02        | -.07        | -.05        | <b>.75</b>   | .16          | .85 |
| FFiCD WRK | <b>.30</b>  | -.06       | .00         | -.08        | <b>.66</b>   | .09          | .64 |
| FFiCD IRS | <b>.72</b>  | .09        | -.01        | -.04        | <b>-.54</b>  | .03          | .84 |
| FFiCD DSR | <b>.68</b>  | -.03       | -.11        | -.08        | <b>-.52</b>  | -.02         | .73 |
| PiCD DN   | <b>.76</b>  | -.16       | -.13        | -.01        | <b>-.42</b>  | -.20         | .90 |
| FFiCD UNA | <b>.40</b>  | .18        | .18         | -.27        | <b>-.32</b>  | .20          | .55 |
| PID5 DN   | <b>.74</b>  | .08        | -.08        | .09         | -.29         | -.27         | .83 |
| PiCD AN   | .13         | -.01       | -.03        | .04         | .10          | <b>.86</b>   | .82 |
| FFiCD FLX | <b>.33</b>  | .03        | .12         | -.11        | .10          | <b>.64</b>   | .72 |
| FFiCD PRF | <b>.35</b>  | .00        | .04         | -.05        | .33          | <b>.47</b>   | .63 |
| FFiCD TSK | <b>.63</b>  | -.07       | -.11        | .04         | .18          | <b>-.47</b>  | .65 |
| FFiCD RSH | <b>.77</b>  | .11        | -.14        | .01         | -.10         | -.27         | .74 |

Note. FFiCD = Five-Factor Personality Inventory for ICD-11, PiCD = Personality Inventory for ICD-11, PID-5 = Personality Inventory for DSM-5, FFM = five-factor model, N = neuroticism/negative affectivity, DL = dissociation, DN = disinhibition, A = agreeableness, C = conscientiousness, AK = anankastia, DT = detachment, E = extraversion.

FFiCD SUPPLMENTAL MATERIALS

Supplemental Table S7. *Correlations Among the FFiCD Nuances and the PiCD, FFM, and PID-5 Domains.*

| Domain | Nuance             | PiCD<br>DL | PiCD<br>AK | PiCD<br>NA | PiCD<br>DT | PiCD<br>DN | FFM<br>E | FFM<br>A    | FFM<br>C | FFM<br>N   | FFM<br>O | PID<br>5<br>NA | PID<br>5<br>DT | PID<br>5<br>AT | PID<br>5<br>DN | PID<br>5<br>PSY |
|--------|--------------------|------------|------------|------------|------------|------------|----------|-------------|----------|------------|----------|----------------|----------------|----------------|----------------|-----------------|
|        | Passive Aggr       | <b>.62</b> | -.18       | .18        | .23        | <b>.54</b> | .16      | -.41        | -.29     | .08        | .13      | .14            | .23            | <b>.55</b>     | .46            | .49             |
|        | Physical Aggr      | <b>.64</b> | -.04       | .25        | .24        | .47        | .20      | -.39        | -.15     | .15        | .10      | .20            | .23            | <b>.50</b>     | .42            | .43             |
|        | Verbal Aggr        | <b>.70</b> | -.08       | .35        | .30        | <b>.59</b> | .12      | <b>-.54</b> | -.29     | .24        | -.13     | .27            | .30            | <b>.62</b>     | <b>.56</b>     | .48             |
|        | Lack of<br>Empathy | <b>.67</b> | -.09       | .19        | .31        | .46        | .12      | <b>-.58</b> | -.22     | .08        | -.19     | .15            | .34            | <b>.61</b>     | .45            | .45             |
|        | Exploitative       | <b>.68</b> | -.11       | .29        | .25        | <b>.52</b> | .14      | -.49        | -.29     | .16        | -.01     | .24            | .24            | <b>.70</b>     | <b>.52</b>     | .47             |
|        | Manipulative       | <b>.79</b> | -.11       | .28        | .27        | <b>.61</b> | .13      | <b>-.61</b> | -.34     | .17        | -.05     | .23            | .28            | <b>.75</b>     | <b>.55</b>     | <b>.54</b>      |
|        | Arrogance          | <b>.69</b> | .00        | .14        | .13        | .41        | .32      | -.48        | -.11     | -.02       | .03      | .12            | .10            | <b>.68</b>     | .41            | .43             |
|        | Entitlement        | <b>.64</b> | -.12       | .19        | .17        | <b>.52</b> | .23      | -.44        | -.26     | .05        | -.07     | .17            | .18            | <b>.67</b>     | .48            | .46             |
|        | Selfishness        | <b>.64</b> | -.08       | .29        | .36        | <b>.51</b> | .07      | <b>-.54</b> | -.31     | .15        | -.14     | .21            | .33            | <b>.59</b>     | .49            | .45             |
| DL     | Vanity             | <b>.55</b> | -.07       | .11        | .03        | .41        | .39      | -.29        | -.09     | -.01       | .12      | .16            | .02            | <b>.51</b>     | .34            | .37             |
|        | Annoyed            | .42        | .13        | <b>.62</b> | .46        | .43        | -.22     | -.36        | -.28     | <b>.53</b> | -.10     | .47            | .40            | .29            | .44            | .35             |
|        | Dysreg Anger       | .37        | .11        | <b>.62</b> | .41        | .41        | -.17     | -.28        | -.24     | <b>.60</b> | -.11     | <b>.55</b>     | .40            | .27            | .44            | .38             |
|        | Reactive Anger     | .39        | .16        | <b>.62</b> | .40        | .40        | -.15     | -.27        | -.23     | <b>.51</b> | -.10     | <b>.54</b>     | .39            | .29            | .40            | .37             |
|        | Eval Appr          | .03        | .20        | <b>.70</b> | .39        | .27        | -.34     | .08         | -.20     | <b>.70</b> | .00      | <b>.67</b>     | .42            | .02            | .33            | .32             |
|        | Sep Insecurity     | .09        | .14        | <b>.64</b> | .33        | .33        | -.24     | .02         | -.26     | <b>.61</b> | .05      | <b>.69</b>     | .32            | .10            | .36            | .40             |
|        | Soc<br>Anxiousness | -.07       | .23        | <b>.65</b> | <b>.50</b> | .18        | -.50     | .06         | -.17     | <b>.63</b> | -.06     | <b>.52</b>     | .45            | -.09           | .23            | .23             |
|        | Int Inadequacy     | .05        | .21        | <b>.69</b> | .42        | .28        | -.33     | .03         | -.21     | <b>.66</b> | -.02     | <b>.63</b>     | .38            | .04            | .35            | .31             |
|        | Pessimism          | .20        | .07        | <b>.66</b> | .49        | .37        | -.39     | -.22        | -.33     | <b>.63</b> | -.05     | <b>.62</b>     | <b>.58</b>     | .22            | .47            | .45             |
|        | Suicidality        | .22        | -.01       | .37        | .32        | .33        | -.14     | -.13        | -.24     | .41        | .04      | .38            | .36            | .20            | .35            | .37             |
|        | Worthlessness      | .09        | .08        | <b>.66</b> | <b>.54</b> | .37        | -.46     | -.07        | -.40     | <b>.68</b> | -.14     | <b>.64</b>     | <b>.57</b>     | .07            | .44            | .39             |
|        | Affectv Dysreg     | .29        | .04        | <b>.78</b> | .41        | <b>.53</b> | -.22     | -.19        | -.37     | <b>.75</b> | .00      | <b>.76</b>     | .47            | .27            | <b>.60</b>     | <b>.55</b>      |
|        | Shamefulness       | .35        | .05        | <b>.79</b> | .43        | .49        | -.20     | -.27        | -.34     | <b>.69</b> | -.01     | <b>.74</b>     | .47            | .29            | <b>.55</b>     | <b>.53</b>      |
|        | Humiliation        | .07        | .31        | <b>.71</b> | .42        | .24        | -.33     | .05         | -.14     | <b>.64</b> | -.03     | <b>.61</b>     | .39            | .07            | .29            | .30             |
| NA     | Self-Conscious     | .14        | .24        | <b>.73</b> | <b>.55</b> | .33        | -.39     | -.04        | -.22     | <b>.66</b> | -.07     | <b>.65</b>     | <b>.52</b>     | .13            | .39            | .40             |

FFiCD SUPPLMENTAL MATERIALS

|    |                 |            |            |            |            |            |      |      |             |            |      |            |            |      |            |            |
|----|-----------------|------------|------------|------------|------------|------------|------|------|-------------|------------|------|------------|------------|------|------------|------------|
|    | Fragility       | .07        | .12        | <b>.78</b> | .41        | .37        | -.36 | -.02 | -.31        | <b>.75</b> | -.02 | <b>.74</b> | .43        | .09  | .44        | .43        |
|    | Need for Adm    | -.05       | .21        | <b>.66</b> | .44        | .22        | -.46 | .08  | -.20        | <b>.66</b> | -.02 | <b>.60</b> | .42        | -.03 | .28        | .25        |
|    | Disorgniazation | .32        | -.30       | .41        | .23        | <b>.74</b> | -.06 | -.21 | <b>-.68</b> | .41        | .08  | .44        | .26        | .27  | <b>.67</b> | .45        |
|    | Disorg Speech   | .42        | -.03       | <b>.55</b> | .40        | <b>.62</b> | -.10 | -.27 | -.43        | .47        | -.06 | <b>.54</b> | .38        | .38  | <b>.64</b> | <b>.60</b> |
|    | Disobliged      | .43        | -.21       | .44        | .32        | <b>.70</b> | -.08 | -.25 | <b>-.54</b> | .39        | .06  | .41        | .34        | .37  | <b>.67</b> | <b>.51</b> |
|    | Distractibility | .35        | -.12       | <b>.56</b> | .39        | <b>.68</b> | -.20 | -.27 | <b>-.65</b> | <b>.54</b> | -.08 | <b>.52</b> | .38        | .31  | <b>.69</b> | .49        |
|    | Impersistence   | .25        | -.09       | <b>.58</b> | .42        | <b>.57</b> | -.31 | -.20 | <b>-.61</b> | <b>.59</b> | -.18 | <b>.53</b> | .45        | .25  | <b>.63</b> | .40        |
|    | Ineptitude      | .26        | -.09       | <b>.62</b> | .40        | <b>.61</b> | -.24 | -.16 | <b>-.55</b> | <b>.59</b> | -.04 | <b>.65</b> | .38        | .28  | <b>.65</b> | <b>.55</b> |
|    | Rash Behaviors  | .49        | -.31       | .44        | .24        | <b>.75</b> | .10  | -.29 | -.49        | .40        | .00  | .44        | .26        | .44  | <b>.73</b> | <b>.54</b> |
| DN | Rash Thinking   | <b>.52</b> | -.12       | <b>.57</b> | .31        | <b>.66</b> | .00  | -.31 | -.42        | <b>.51</b> | -.06 | <b>.53</b> | .34        | .45  | <b>.66</b> | <b>.53</b> |
|    | Joylessness     | .17        | .10        | .35        | <b>.63</b> | .23        | -.40 | -.14 | -.19        | .29        | -.23 | .23        | <b>.58</b> | .10  | .24        | .19        |
|    | Phy Anhedonia   | .45        | .01        | .39        | .46        | .46        | -.07 | -.30 | -.22        | .29        | -.20 | .35        | .47        | .44  | .48        | .48        |
|    | Soc Anhedonia   | .30        | .17        | .40        | <b>.69</b> | .24        | -.38 | -.35 | -.21        | .33        | -.17 | .28        | <b>.65</b> | .20  | .28        | .33        |
|    | Coldness        | .03        | .41        | .37        | <b>.55</b> | .02        | -.29 | .04  | .15         | .21        | -.13 | .22        | .41        | -.02 | .03        | .14        |
| DT | Soc Isolation   | .02        | .22        | .37        | <b>.58</b> | .03        | -.46 | -.09 | -.03        | .37        | -.01 | .26        | <b>.54</b> | -.02 | .08        | .16        |
|    | Dogmatism       | .13        | .36        | .23        | .20        | .01        | .01  | .11  | .20         | .16        | -.26 | .21        | .17        | .09  | .05        | .13        |
|    | Rigidity        | .05        | <b>.53</b> | .29        | .36        | -.10       | -.26 | .05  | .16         | .19        | -.32 | .20        | .26        | .00  | -.09       | -.01       |
|    | Risk Averse     | -.09       | <b>.57</b> | .32        | .37        | -.14       | -.36 | .11  | .15         | .23        | -.31 | .23        | .31        | -.11 | -.10       | .01        |
|    | Rum Delibr      | -.10       | <b>.66</b> | .31        | .30        | -.23       | -.22 | .18  | .32         | .20        | .00  | .23        | .23        | -.11 | -.20       | -.02       |
|    | Fastidious      | .21        | <b>.58</b> | .31        | .32        | -.09       | -.03 | -.03 | .34         | .13        | -.04 | .24        | .22        | .17  | -.03       | .18        |
|    | Punctilious     | .02        | <b>.54</b> | .21        | .24        | -.14       | -.04 | .20  | .33         | .10        | -.21 | .15        | .15        | -.08 | -.12       | .03        |
|    | Doggedness      | .03        | .46        | -.08       | -.05       | -.26       | .34  | .18  | <b>.62</b>  | -.23       | .10  | -.10       | -.15       | .05  | -.31       | -.03       |
| AK | Work Preocc     | .20        | .35        | .29        | .33        | .04        | .01  | -.07 | .26         | .16        | -.11 | .21        | .24        | .18  | .12        | .28        |

*Note.* Strong effect sizes in bold. PiCD = Personality Inventory for ICD-11, PID-5 = Personality Inventory for DSM-5, FFM = five-factor model, N = neuroticism/negative affectivity, DL = dissociality, DN = disinhibition, A = agreeableness, C = conscientiousness, AK = anankastia, DT = detachment, E = extraversion. Aggr = aggressiveness, Dysreg = dysregulation, eval = evaluation, Appr = apprehension, Sep = separation, soc = social, Int = interpersonal, Adm = adiration, Disorg = disorganized, Phy = physical, Delibr = deliberation, Preocc = preoccupation.

The Five-Factor Personality Inventory for ICD-11

Instructions: Below are several statements about the way you may feel or behave. Please answer each question in the way that best describes you on a 1 to 5 point scale, where 1 = strongly disagree with the statement, 2 = disagree, 3 = neutral, 4 = agree, and 5 = strongly agree with the statement. Please read each item carefully and provide your answer that best corresponds to your agreement or disagreement. There are no right or wrong answers. Describe yourself honestly and state your opinions as accurately as possible.

1. My anxiety often keeps me from doing things I would like to do.
2. I consider myself to be more of a loner than most people.
3. Other people have said that I'm extremely detail oriented, almost to a fault.
4. I sometimes feel very fragile.
5. I'm not all that concerned with other peoples' needs.
6. I get into trouble because I don't think things through.
7. My emotions can spiral out of control.
8. I usually find myself thinking about work, even in the middle of a vacation.
9. I don't get upset with the suffering of others.
10. I get very annoyed at even minor frustrations.
11. I tend to give up when a task becomes difficult.
12. I constantly compare myself to others and never feel good enough.
13. My friends would be surprised if I ever jumped for joy.
14. My life is pretty much the same every week, and that's how I like it.
15. I have physically hit persons.
16. My fear of embarrassing myself makes it hard to enjoy being with friends.
17. I am not well organized.
18. When someone does something nice for me, I wonder what they want from me.
19. I am not very assertive with others.
20. Following the rules is always important, even if I'm playing a game by myself.
21. I deserve to receive special treatment.
22. I have often been afraid of losing someone I depend on.
23. I've gotten in trouble because of some of the risks I've taken.
24. I tend to be serious around others.
25. I examine every detail of an issue before coming to a decision.
26. I feel very insecure about whether I will achieve much in life.
27. I quit things pretty easily.
28. Sometimes to succeed you need to use other people.
29. I tend to leap to conclusion.
30. I feel enraged when people disrespect me.
31. I don't form strong bonds with people, even my friends.
32. I much prefer playing it safe, even if miss out on something.
33. I will make threats to get people to do things.
34. I have thought about ways to kill myself.
35. I rarely follow through on things without the help of others.

## FFiCD SUPPLMENTAL MATERIALS

36. When I realize I have failed at something, I feel humiliated.
37. I am a very methodical person; perhaps too much so.
38. I make sure to dress in ways that make people notice me.
39. I often feel nervous when I'm in a group of unfamiliar people.
40. Morality means adhering to a strict set of rules and principles.
41. I find it easy to manipulate others.
42. I don't do well under pressure.
43. I have difficulty doing things on my own.
44. The taste of food does not give me much pleasure.
45. My emotions can change quickly and unpredictably.
46. I am known as something of a "workaholic."
47. I've gotten in trouble for missing too much work or school.
48. I get a kick out of challenging so-called authority figures.
49. I often lose my patience when dealing with other people.
50. My style of speech is disorganized and not well thought out.
51. I often get really pessimistic about the future
52. I am a bit of a loner.
53. I like to be really sure about things before I act.
54. Some people say I'm too cocky and full of myself.
55. I don't seem to have much control over how I feel.
56. I have done a lot of wild things in my life.
57. I firmly believe that you should always play strictly by the rules.
58. I don't feel like I have anything to offer anyone.
59. I don't have much influence on persons around me.
60. Most people are just too soft-hearted.
61. I am usually painfully aware of how other people see me.
62. I wish that I were better able to think before I acted.
63. I often feel that there are hidden threats or put-downs in what people say or do.
64. If I start something I work until it is complete.
65. Other people have called me manipulative.
66. I'm a pretty moody person.
67. I have trouble making myself get things done.
68. Intense joy or elation is mostly unknown to me.
69. My anger at times gets the better of me.
70. There is never an excuse for deviating from a moral code.
71. If someone starts a fight, I have no problem finishing it.
72. Not measuring up to others' expectations feels like a constant weight on my shoulders.
73. People say I'm rather disorganized and cluttered.
74. I strive for perfection, even on what other people might call minor details
75. It is really quite shameful to publicly fail.
76. I want to know what is in it for me before I agree to help someone.
77. I spend a lot of time worrying about what might happen.
78. It is difficult to stick to the task at hand when I am by myself.
79. I wish I didn't care so much about what others think of me.
80. I prefer to be a follower than to be the leader of a group.
81. I get so caught up in my work that I lose time for other things.

## FFiCD SUPPLMENTAL MATERIALS

82. I'm willing to exploit others to further my own goals.
83. I have a difficult time controlling my mood.
84. I tend to confuse people when I express myself.
85. I am definitely a creature of habit.
86. I am easily annoyed.
87. I have been told that I'm bossy or mean.
88. I have thought about suicide since I was a teenager.
89. My initial quick judgments sometimes get me into trouble.
90. I almost can't bear it when people laugh at me.
91. People consider me a rather serious and reserved person.
92. I can be pretty exacting when it comes to duty and honor.
93. I don't have much self-discipline when working by myself.
94. I don't think the rules apply to me as much as they apply to others.
95. I sometimes feel that others have it in for me.
96. I have gotten in trouble for failing to meet my obligations to others.
97. I have often been nervous that someone won't want to stay with me.
98. I believe that safe and predictable beats exciting and dangerous every time.
99. Feeling sorry for others is a sign of weakness.
100. I often feel that life overwhelms me.
101. When I put my mind to something, nothing can stop me from finishing
102. I've had problems with authority figures.
103. I have very little hope that things will get better for me.
104. I tend to jump right into things without thinking very far ahead.
105. I feel so bad when I get put down in front of others.
106. I am not emotionally close to most people.
107. I think things over and over and over before I make a decision.
108. I am easily able to make others sexually attracted to me.
109. People make me nervous.
110. I tend to make a lot of mistakes.
111. I will mislead people if I think it's necessary.
112. It's difficult to trust my feelings as they can so easily change.
113. I am a superior person.
114. I have a habit of reaching conclusions before I know all the facts.
115. I sometimes feel worthless.
116. I find there are few things that are pleasurable to look at.
117. I'm fanatical about getting things done when they need to be.
118. I don't stick to any clear organization or order to things.
119. The criticism I get sometimes makes me really mad.
120. I will try almost anything to get my "thrills".
121. It troubles me how society is losing its strong moral core.

## FFiCD SUPPLEMENTAL MATERIALS

### Scoring:

#### FFiCD Domains

**Anankastia** = 3 + 8 + 14 + 20 + 25 + 32 + 37 + 40 + 46 + 53 + 57 + 64 + 70 + 74 + 81 + 85 + 92 + 98 + 101 + 107 + 117 + 121.

**Dissociality** = 5 + 9 + 15 + 21 + 28 + 33 + 38 + 41 + 48 + 54 + 60 + 65 + 71 + 76 + 82 + 87 + 94 + 99 + 102 + 108 + 111 + 113.

**Disinhibition** = 6 + 11 + 17 + 23 + 27 + 29 + 35 + 43 + 47 + 50 + 56 + 62 + 67 + 73 + 78 + 84 + 89 + 93 + 96 + 104 + 110 + 114 + 118 + 120.

**Detachment** = 2 + 13 + 19 + 24 + 31 + 44 + 52 + 59 + 68 + 80 + 91 + 106 + 116.

**Negative Affectivity** = 1 + 4 + 7 + 10 + 12 + 16 + 18 + 22 + 26 + 30 + 34 + 36 + 39 + 42 + 45 + 49 + 51 + 55 + 58 + 61 + 63 + 66 + 69 + 72 + 75 + 77 + 79 + 83 + 86 + 88 + 90 + 95 + 97 + 100 + 103 + 105 + 109 + 112 + 115 + 119.

#### FFiCD Facets

##### **Dissociality**

Aggression = 15 + 33 + 48 + 71 + 87 + 102.

Lack of Empathy = 9 + 28 + 41 + 60 + 65 + 82 + 99 + 111.

Self-Centeredness = 5 + 21 + 38 + 54 + 76 + 94 + 108 + 113.

##### **Negative Affectivity**

Anger = 10 + 30 + 49 + 69 + 86 + 119.

Anxiousness = 1 + 22 + 39 + 77 + 97 + 109.

Depressiveness = 12 + 34 + 51 + 58 + 72 + 88 + 103 + 115.

Emotional Lability = 7 + 45 + 55 + 66 + 83 + 112.

Mistrustfulness = 18 + 63 + 95.

Shame = 16 + 36 + 61 + 75 + 90 + 105.

Vulnerability = 4 + 26 + 42 + 79 + 100.

##### **Disinhibition**



## FFiCD SUPPLEMENTAL MATERIALS

Disorderliness = 17 + 50 + 73 + 84 + 118.

Irresponsibility = 11 + 27 + 35 + 43 + 47 + 67 + 78 + 93 + 96 + 110.

Rashness = 6 + 29 + 62 + 89 + 104 + 114.

Thrill-Seeking = 23 + 56 + 120.

### **Detachment**

Emotional Detachment = 13 + 31 + 44 + 68 + 106 + 116.

Social Detachment = 2 + 24 + 52 + 91.

Unassertiveness = 19 + 59 + 80.

### **Anankastia**

Inflexibility = 14 + 25 + 32 + 40 + 53 + 70 + 85 + 98 + 107 + 121.

Perfectionism = 3 + 20 + 37 + 57 + 74 + 92.

Workaholism = 8 + 46 + 64 + 81 + 101 + 117.

## FFiCD Nuances

### **Dissociality**

Passive Aggression = 48 + 102.

Physical Aggression = 15 + 71.

Verbal Aggression = 33 + 87.

Callousness = 9 + 60 + 99.

Exploitativeness = 28 + 82.

Manipulativeness = 41 + 65 + 111.

Arrogance = 54 + 113.

Entitlement = 21 + 94.

## FFiCD SUPPLMENTAL MATERIALS

Selfishness = 5 + 76.

Vanity = 38 + 108.

### **Negative Affectivity**

Annoyed = 49 + 86.

Dysregulated Anger = 10 + 69.

Reactive Anger = 30 + 119.

Evaluation Apprehension = 1 + 77.

Separation Insecurity = 22 + 97.

Social Anxiousness = 39 + 109.

Interpersonal Inadequacy = 12 + 72.

Pessimism = 51 + 103.

Suicidality = 34 + 88.

Worthlessness = 58 + 115.

Affective Dysregulation = 7 + 55 + 83.

Rapidly Shifting Emotions = 45 + 66 + 112.

Humiliation = 36 + 75 + 105.

Self-Consciousness = 16 + 61 + 90.

Fragility = 4 + 42 + 100.

Need for Admiration = 26 + 79.

### **Disinhibition**

Disorganization = 17 + 73 + 118.

Disorganized Speech = 50 + 84.

Disobliged = 47 + 96.

## FFiCD SUPPLMENTAL MATERIALS

Distractibility = 35 + 78 + 93.

Impersistence = 11 + 27 + 67.

Ineptitude = 43 + 110.

Rash Behaviors = 6 + 62 + 104.

Rash Thinking = 29 + 89 + 114.

### **Detachment**

Joylessness = 13 + 68.

Physical Anhedonia = 44 + 116.

Social Anhedonia = 31 + 106.

Coldness = 24 + 91.

Social Isolation = 2 + 52.

### **Anankastia**

Dogmatism = 40 + 70 + 121.

Rigidity = 14 + 85.

Risk Aversiveness = 32 + 98.

Ruminative Deliberation = 25 + 53 + 107.

Fastidiousness = 3 + 37 + 74.

Punctiliousness = 20 + 57 + 92.

Doggedness = 64 + 101 + 117.

Work Preoccupation = 8 + 46 + 81.
